# Supplementary material
Source: PubMed Central journal article supplement (PMC2662973)
Supplement: supp_173_12_1335_v2_1.pdf [file supp_173_12_1335_v2_1.pdf]

**Variant IRAK-1 haplotype is associated with increased NF- $\kappa$ B  
activation and worse outcomes in sepsis**

**John Arcaroli, Eliezer Silva, James P Maloney, Qianbin He, Daiva  
Svetkauskaite, James R Murphy, Edward Abraham**

**Online Data Supplement**

PRIMARY DATA FOR FIGURE 1

| Patient Number | Haplotype | LPS 0 | LPS 30 | LPS 60 | NF- $\kappa$ B AUC |
|----------------|-----------|-------|--------|--------|--------------------|
| pt020          | Variant   | 1     | 2.52   | 2.81   | 148.24             |
| pt021          | Variant   | 1     | 3.26   | 1.66   | 173.20             |
| pt024          | Variant   | 1     | 4.06   | 3.06   | 191.43             |
| pt025          | Variant   | 1     | 1.32   | 1.00   | 65.79              |
| pt028          | Variant   | 1     | 1.82   | 1.00   | 91.08              |
| pt035          | Variant   | 1     | 2.00   | 1.75   | 128.27             |
| pt056          | Variant   | 1     | 2.12   | 1.83   | 105.78             |
|                |           |       |        |        |                    |
| pt018          | Wild type | 1     | 1.78   | 1.11   | 85.83              |
| pt019          | Wild type | 1     | 1.61   | 2.43   | 95.79              |
| pt022          | Wild type | 1     | 1.00   | 1.36   | 66.43              |
| pt026          | Wild type | 1     | 1.48   | 1.99   | 93.98              |
| pt027          | Wild type | 1     | 1.80   | 1.59   | 104.04             |
| pt038          | Wild type | 1     | 1.06   | 1.00   | 67.72              |
| pt039          | Wild type | 1     | 1.24   | 1.44   | 84.60              |
| pt040          | Wild type | 1     | 1.60   | 1.27   | 67.00              |
| pt041          | Wild type | 1     | 1.25   | 1.11   | 73.13              |
| pt042          | Wild type | 1     | 1.28   | 1.36   | 77.97              |
| pt043          | Wild type | 1     | 1.64   | 1.41   | 88.66              |
| pt044          | Wild type | 1     | 1.16   | 1.43   | 72.76              |
| pt045          | Wild type | 1     | 1.28   | 1.12   | 72.17              |
| pt046          | Wild type | 1     | 1.36   | 1.07   | 72.25              |
| pt047          | Wild type | 1     | 1.90   | 2.04   | 99.03              |
| pt048          | Wild type | 1     | 1.28   | 1.27   | 76.31              |
| pt049          | Wild type | 1     | 1.94   | 1.25   | 95.01              |
| pt050          | Wild type | 1     | 1.00   | 1.20   | 66.93              |
| pt051          | Wild type | 1     | 1.78   | 1.12   | 96.27              |
| pt052          | Wild type | 1     | 3.15   | 3.07   | 161.28             |
| pt053          | Wild type | 1     | 1.16   | 1.08   | 78.42              |
| pt055          | Wild type | 1     | 1.09   | 1.00   | 62.32              |
| pt057          | Wild type | 1     | 1.57   | 1.42   | 87.65              |
